# Supplementary material
Source: PubMed Central journal article supplement (PMC3310420)

## Supplemental Material

### Drug Metabolism and Disposition

#### **Respective roles of CYP2A5 and CYP2F2 in the Bioactivation of 3-Methylindole in Mouse Olfactory Mucosa and Lung: Studies Using *Cyp2a5*-null and *Cyp2f2*-null Mouse Models**

Xin Zhou, Jaime D'Agostino, Lei Li, Chad D. Moore, Garold S. Yost and Xinxin Ding

*Laboratory of Molecular Toxicology, Wadsworth Center, New York State Department of Health, and School of Public Health, State University of New York at Albany, Albany, New York (XZ, JD, LL, XD) and Department of Pharmacology and Toxicology, University of Utah, Salt Lake City, Utah (CDM, GSY)*

## Legends for Supplemental Figures

**Fig. S1.** Substrate-velocity curves for 3-methylindole metabolite formation by olfactory mucosa (OM) and lung microsomes from wild-type (WT), *Cyp2a5*-null, and *Cyp2f2*-null mice. The calculated kinetic parameters are shown in Tables 1 and 2.

**Supplemental TABLE 1**

*Ion list used for 3-methylindole metabolite detection in multiple ion monitoring-dependent enhanced product ion scan*

| Molecular Ion (MH <sup>+</sup> ) | Species       | Mass Shift | Reaction                                |
|----------------------------------|---------------|------------|-----------------------------------------|
| 132                              | Parent        | 0          |                                         |
| 148                              | Metabolite    | 16         | + O                                     |
| 164                              |               | 32         | + 2O                                    |
| 130                              |               | -2         | + O, -H <sub>2</sub> O (on-source loss) |
| 437                              | GSH-conjugate | 305        | + GSH                                   |
| 453                              |               | 321        | + GSH+O-2H                              |
| 455                              |               | 323        | + GSH+O                                 |

Supplemental Fig. 1

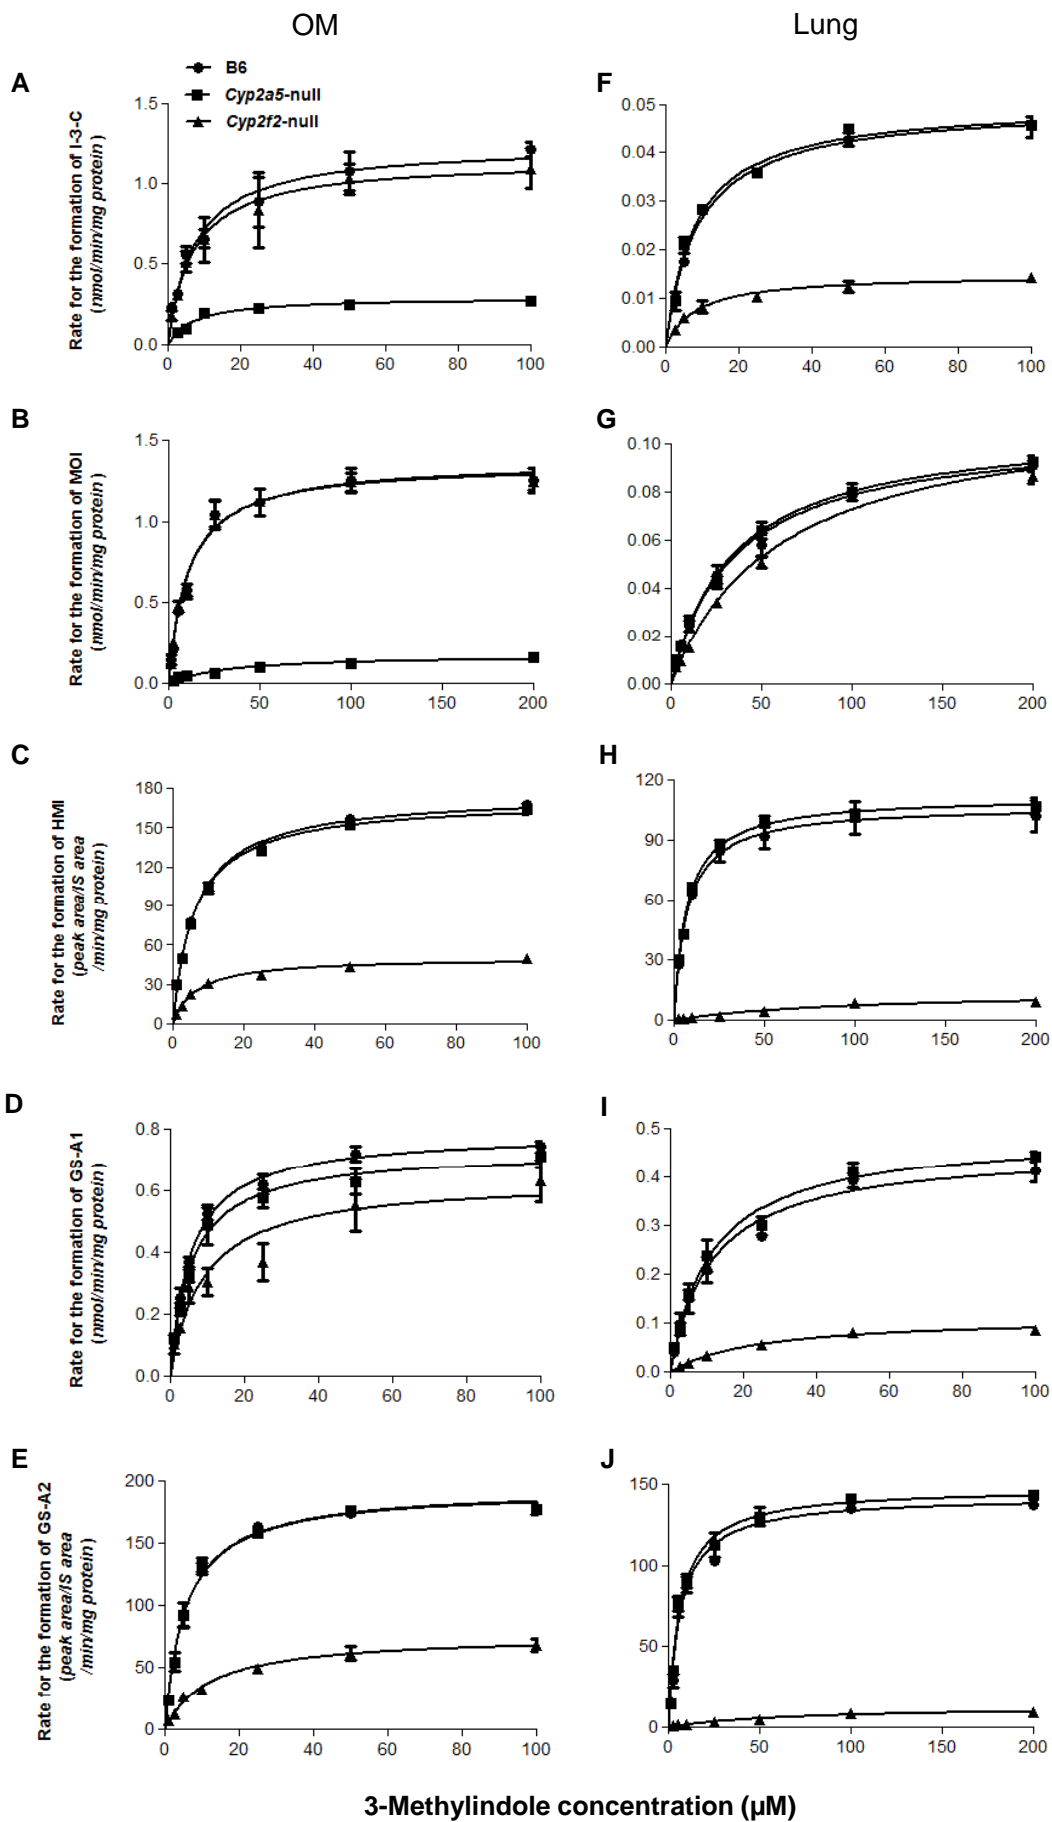

Supplement: supp_111.044081_DMD_Supl_materialrevised.pdf [file supp_111.044081_DMD_Supl_materialrevised.pdf]
